# Supplementary material for: Integrated label-free silicon nanowire sensor arrays for (bio)chemical analysis
Source: Royal Society of Chemistry journal article supplement (doi:10.1039/c3an36586g), 2013-01-01
Supplement: c3an36586g.pdf [file c3an36586g.pdf]

## Integrated label-free silicon nanowire sensor arrays for (bio)chemical analysis

Arpita De, Jan van Nieuwkasteele, Edwin T. Carlen\*, Albert van den Berg

BIOS Lab on a Chip Group, Mesa+ Institute for Nanotechnology, University of Twente, Postbus 217, 7500 AE Enschede, The Netherlands

\*Corresponding author: Dr. Edwin Carlen, University of Twente, MESA+ Institute for Nanotechnology, P.O. Box 217, 7500 AE Enschede, The Netherlands; Tel:+31 (0)53 489 5399; Fax: +31 (0)53 489 3595; Email: [e.t.carlen@utwente.nl](mailto:e.t.carlen@utwente.nl)

### Sample injection design and testing protocol

A typical sample injection protocol using the microfluidic autosampler system is described. A sample plug injection from  $SR_1$  is injected into the microfluidic flow-cell with buffer from  $SR_2$ . Figure S1 shows the different valve positions that are automatically set as switch position A or B during the injection procedure.

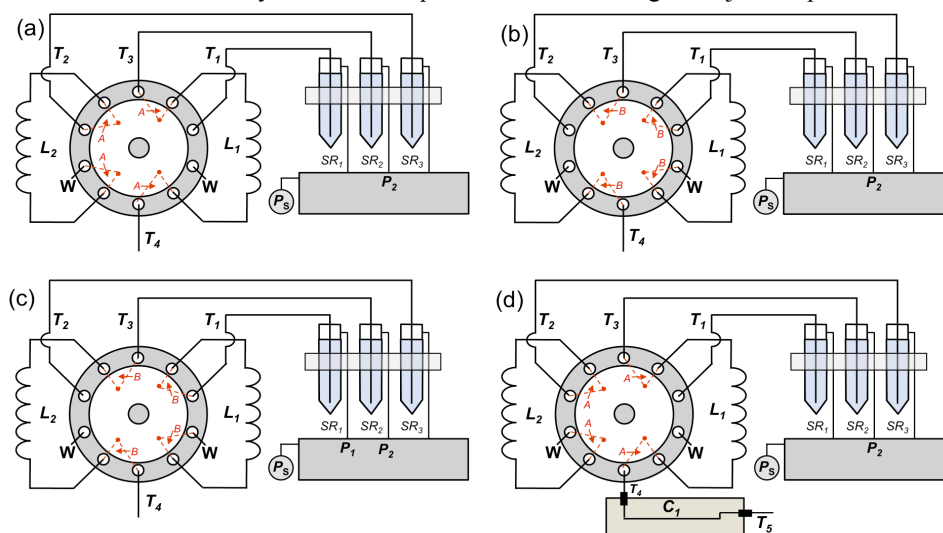

Fig. S1 Automated sample injector protocol.

The protocol for the loading and injection of a single sample is described below:

Step 1 (Fig. S1a and Fig. S1b): System purge (microfluidic flow-cell not connected to  $T_4$ ):

1. Purge sample loop  $L_1$  with buffer ( $SR_2$ ,  $P_2=1$  bar;  $T_3+L_1+T_4$ ; Fig. S1a, switch pos. A)
2. Purge sample loop  $L_2$  with buffer ( $SR_2$ ,  $P_2=1$  bar;  $T_3+L_2+T_4$ ; Fig. S1b, switch pos. B)

Step 2 (Fig. S1c, switch pos. B): Load sample 1 to loop  $L_1$ :

1. Load sample loop  $L_1$  with sample 1 ( $SR_1$ ,  $P_1=1$  bar;  $T_1+L_1$  to waste  $W$ )
2. Stop when sample appear at waste  $W$  outlet

Step 3 (Fig. S1d, switch pos. A): Injection of sample 1 ( $SR_1$ ):

1. Connect  $T_4$  to microfluidic flow-cell
2. Continue injecting buffer ( $SR_2$ ,  $P_3=1$  bar) through sample loop  $L_2$  and microfluidic flow-cell ( $T_3+L_2+T_4+C_1+T_5$ ) using maximum drive pressure, i.e.  $P_2=1$  bar
3. When sensor output is stable inject sample 1 ( $SR_2$ ,  $P_2$ ;  $T_3+L_1+T_4+C_1+T_5$ )

The tubing lengths and diameters ( $T_3$ ,  $T_4$  and  $T_5$ ) are determined by the range of the regulated pressure source  $P_2$  and desired sample flow rate  $Q$ . The total equivalent hydraulic resistance  $R_{hyd}$  and the volumetric flow rate  $Q$  can be estimated with  $Q=\Delta P/R_{hyd}$ . The hydraulic resistance of a tube, or microchannel with circular cross-section is  $R_{hyd}\approx 8\mu L/\pi a^4$ , where  $\mu$  is the dynamic viscosity of the sample ( $\mu\approx 10^{-3}$  Pa s for water),  $L$  is the length, and  $a$  is the

radius of the cross-section of the hydraulic component. Table A1 shows typical hydraulic resistances for the various tubing and microchannel.

**Table S1** Hydraulic resistances.

| Tube                         | $\phi$<br>$\mu\text{m}$ | $2 \times a$<br>$\mu\text{m}$ | $L$<br>m | $R_{\text{hyd}}$<br>$\text{Pa s m}^{-3}$ |
|------------------------------|-------------------------|-------------------------------|----------|------------------------------------------|
| $T_3$ ( $R_3$ )              | 360                     | 50                            | 0.2      | $1.2 \times 10^{15}$                     |
| $T_4$ ( $R_4$ )              |                         | 150                           | 3.1      | $2.4 \times 10^{14}$                     |
| $L_1, L_2$<br>( $R_1, R_2$ ) |                         | 150                           | 1.6      | $1.2 \times 10^{14}$                     |
| C ( $R_c$ )                  | -                       | 360                           | 0.01     | $2.8 \times 10^{10}$                     |
| $T_5$ ( $R_5$ )              | 700                     | 500                           | 0.03     | $1.9 \times 10^{10}$                     |

Figure S2 shows an equivalent hydraulic circuit diagram of the hydraulic system, where  $R_3$  is the resistance of tube  $T_3$ ,  $R_L$  is the resistance of the loop  $L_1$  and  $L_2$ ,  $R_4$  is the resistance of tube  $T_4$  and  $R_c$  is the resistance of the microfluidic flow-cell microchannel. The volumetric flow

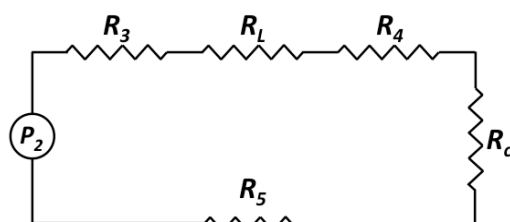

**Fig. S2** Equivalent hydraulic circuit diagram.

rate is estimated with  $Q = P_2 / R_{\text{hyd}}$ , where  $R_{\text{hyd}} = R_3 + R_L + R_4 + R_c + R_5$ . The average flow speed in the circular tube is estimated with  $v_s = Q / \pi a^2$ . Table A2 shows flow speed estimations for different applied pressures.

**Table S2** Flow rates and flow speeds.

| $P_2$<br>Bar | $Q$<br>$\mu\text{l min}^{-1}$ | $v_s$<br>$\text{mm s}^{-1}$ |
|--------------|-------------------------------|-----------------------------|
| 1.0          | 3.75                          | 0.61                        |
| 0.5          | 1.88                          | 0.31                        |
| 0.3          | 1.16                          | 0.19                        |

### Silicon nanowire sensor sample flowrate dependence

The silicon nanowire (Si-NW) sensors are known to be sensitive to flow rate changes due to streaming potential changes on the sensor surface (Kim et al., 2009). Figure S3 shows examples for Si-NW sensor responses to changes in the flow rate in the integrated microfluidic flow-cell. Figure S3a shows that the measured current can change by about 80% when the driving pressure is switched from  $P_1=1$  bar to  $P_2=0$  bar using a deionized water sample. Figure S3b shows about 14% change in current response as the driving pressure is switched from

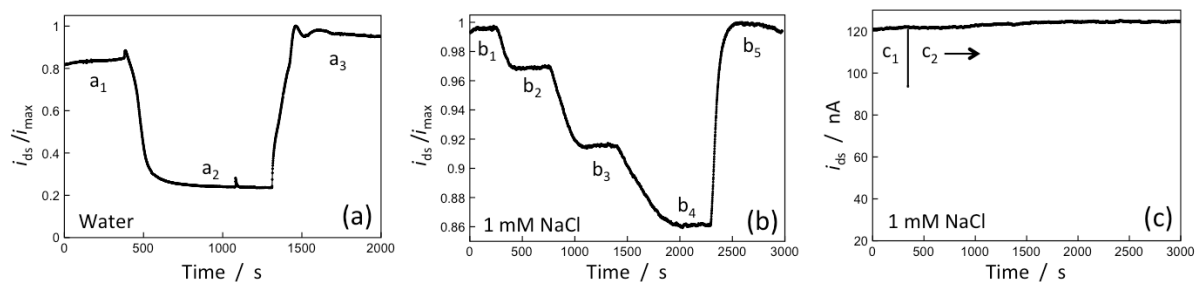

**Fig. S3** Measured Si-NW sensor current to flow rate changes in a microfluidic flow-cell. (a) Deionized water flow rate change as driving pressure is changed from  $a_1$  ( $P_1=1$  bar) to  $a_2$  (0 bar) and then  $a_3$  ( $P_1=1$  bar). (b) Flow rate of 1 mM NaCl buffer as driving pressure is changed from  $b_1$  ( $P_1=1$  bar) to  $b_2$  ( $P_1=0.5$  bar) to  $b_3$  ( $P_1=0.2$  bar) to  $b_4$  ( $P_1=0.1$  bar) and  $b_5$  ( $P_1=1$  bar). (c) Injector switch of 1 mM NaCl buffer from  $c_1$  ( $SR_1, P_1=0.2$  bar) to  $c_2$  ( $SR_2, P_2=0.2$  bar).

$P_1=1$  bar to  $P_1=0.1$  bar in a buffer solution containing 1 mM NaCl. These results are consistent with previous reports, i.e. decreases in the flow rate result in a decrease in conductance of p-type Si-NW devices and increased ionic strength reduces the effect of conductance changes from sample flow rate changes.<sup>1</sup> Figure S3c shows that flow rate changes due to sample switching can be eliminated with the automated multi-sample injection system and pressure driven flow, as described in the accompanying article.

### Silicon nanowire sensor configurations

Figures S4a-c show optical microscopy images of the different device types used for experiments in this article.

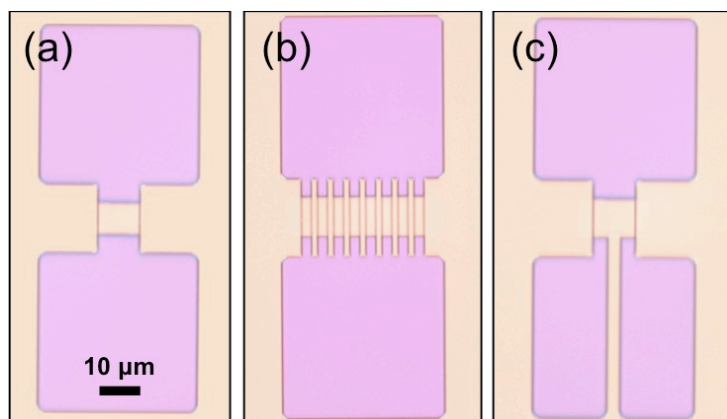

**Fig. S4** Microscopy images of fabricated Si-NWs. (a) 2-wire Si-NW device. (b) 16-wire Si-NW device. (c) Differential Si-NW device with split source contact.

### Silicon nanowire device physics and operation

The conductance change for Si-NWs biased in the depletion region can be approximated with  $\Delta G \approx q\mu_b N_a L^{-1} \Delta \xi$ , where  $\Delta \xi \approx (W - (2)^{1/2} \Delta f_d)(a - (2/3)^{1/2} \Delta f_d)$  is the area of the conductance cross-section of the triangular Si-NW with width  $W$  and height  $a$ , which is modulated by a depletion length function  $\Delta f_d \approx (\gamma^2 t_{ox}^2 + 2\epsilon_{Si}\epsilon_o(V_{fg} - \Delta V_{fb})/qN_a)^{1/2} - \gamma^2 t_{ox}^2$  with  $\gamma = \epsilon_{Si}\epsilon_{ox}^{-1}$ , where  $\epsilon_{Si}$  and  $\epsilon_{ox}$  are the permittivities of silicon and silicon dioxide, respectively,  $t_{ox}$  is the gate-oxide thickness, and finally the flatband voltage change is proportional to the surface potential change  $\Delta V_{fb} = \zeta - \Delta \psi_o$  with  $\zeta = E_{ref} - q^{-1} \phi_{Si} - Q_f C_o^{-1} - Q_{ss} C_o^{-1} + \chi^{sol}$  where  $E_{ref}$  is the reference electrode potential,  $q^{-1} \phi_{Si}$  is the work function of silicon,  $Q_f$  and  $Q_{ss}$  are the fixed charge and interface states near the gate-oxide/silicon interfaces, respectively,  $C_o = \epsilon_{Si}\epsilon_o t_{ox}^{-1}$  is the gate-oxide capacitance and  $\chi^{sol}$  is the surface dipole potential of the sample solution. The flatband voltage provides a direct physical link between  $\Delta \psi_o$  and  $\Delta G$ . It has been assumed that the buried-oxide/silicon interface is not depleted and the back-gate is not electrostatically coupled to the front-gate, which is accomplished in practice by choosing an appropriate  $V_{bg}$ . This brief overview of the basic physical principles of the FET Si-NW sensor operation highlight a few important points that are useful to summarize: i. the application of a dual gate biasing configuration with a reference electrode in the sample buffer ensures optimal and reproducible device behavior; ii. the sensor surface should be well cleaned (e.g. short duration UV ozone) and the detrimental effects from  $Q_f$  and  $Q_{ss}$  at the gate-oxide/silicon interface minimized through thermal annealing; and iii. The contact resistance of the drain and source contacts should be minimized such that it represents a small fraction of the total quiescent sensor resistance.

### Nanoscale imaging

Si-NW samples were prepared for high resolution TEM imaging by depositing a 100 nm thick silicon nitride protection layer onto the upper surface. The sample slices we prepared in a dual-beam focused ion beam (FEI Tecnai G2 F20 X-Twin FEG TEM, Maser Engineering, Enschede, The Netherlands) and transferred to a TEM imaging grid. TEM imaging (FEI 3D-Strata DB-FIB FEG, Maser Engineering, Enschede, The Netherlands) was operated at 200 kV acceleration voltage. Prior to high resolution SEM imaging the Si-NW samples were coated with a Au/Pd thin film to reduce charging of the top oxide surface. SEM imaging (LEO 1550, Zeiss) was performed at acceleration voltages ranging from 2 kV to 10 kV. A Digital Instruments Dimension 3100 AFM

was used to measure the Si-NW dimensions. All AFM images performed in tapping mode with ultra sharp (average tip diameter ~2 nm) single crystal silicon tips (SSH-NCH-10, NanoandMore, GmbH).

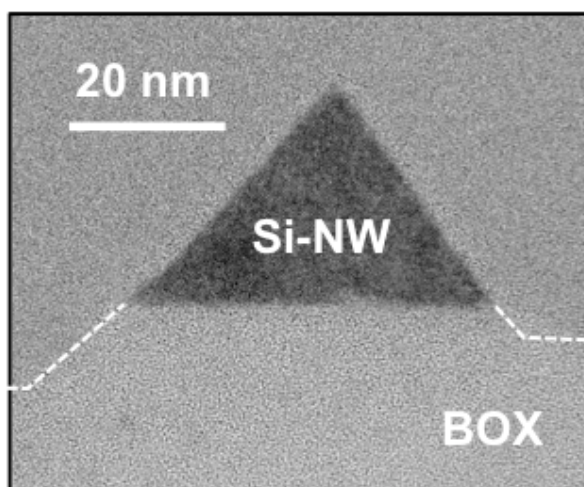

**Fig. S4** High-resolution TEM Si-NW cross-section.

### References

1. D.R. Kim, C.H. Lee and X.L. Zheng, *Nano Lett.*, 2009, **9**, 1984.
